# Supplementary material
Source: PubMed Central journal article supplement (PMC7536538)
Supplement: mmc1.pdf [file mmc1.pdf]

# Outcomes following SARS-CoV-2 infection in patients with chronic liver disease: An international registry study

Thomas Marjot, Andrew M Moon, Jonathan A Cook, Sherief Abd-Elsalam, Costica Aloman, Matthew J Armstrong, Elisa Pose, Erica J Brenner, Tamsin Cargill, Maria-Andreea Catana, Renumathy Dhanasekaran, Ahad Eshraghian, Ignacio García-Juárez, Upkar S Gill, Patricia D Jones, James Kennedy, Aileen Marshall, Charmaine Matthews, George Mells, Carolyn Mercer, Ponni V Perumalswami, Emma Avitabile, Xialong Qi, Feng Su, Nneka N Ufere, Yu Jun Wong, Ming-Hua Zheng, Eleanor Barnes, Alfred S Barritt IV, Gwilym J Webb

## Table of contents

|                          |    |
|--------------------------|----|
| Fig. S1.....             | 2  |
| Fig. S2.....             | 3  |
| Fig. S3.....             | 4  |
| Table S1.....            | 5  |
| Table S2.....            | 6  |
| Table S3.....            | 7  |
| Table S4.....            | 8  |
| Table S5.....            | 9  |
| Table S6.....            | 10 |
| Table S7.....            | 12 |
| Table S8.....            | 14 |
| Supplementary annex..... | 23 |

**Fig. S1 – Non-CLD cohort selection**

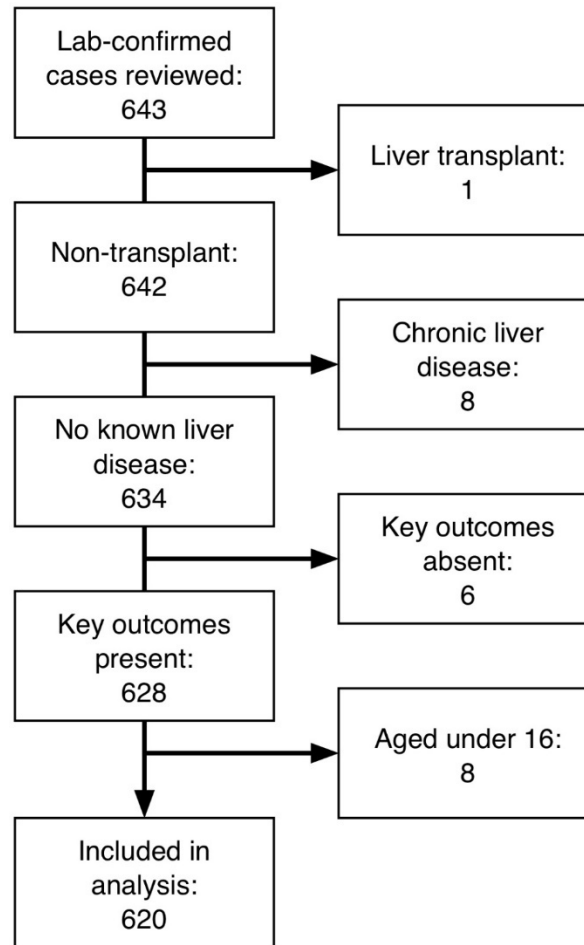

**Fig. S1.** Total submissions of consecutive patients testing positive for SARS-CoV-2 at Oxford University Hospitals NHS Foundation Trust and the number included in the final analysis after exclusions

**Fig. S1 – Countries of origin of CLD cohort**

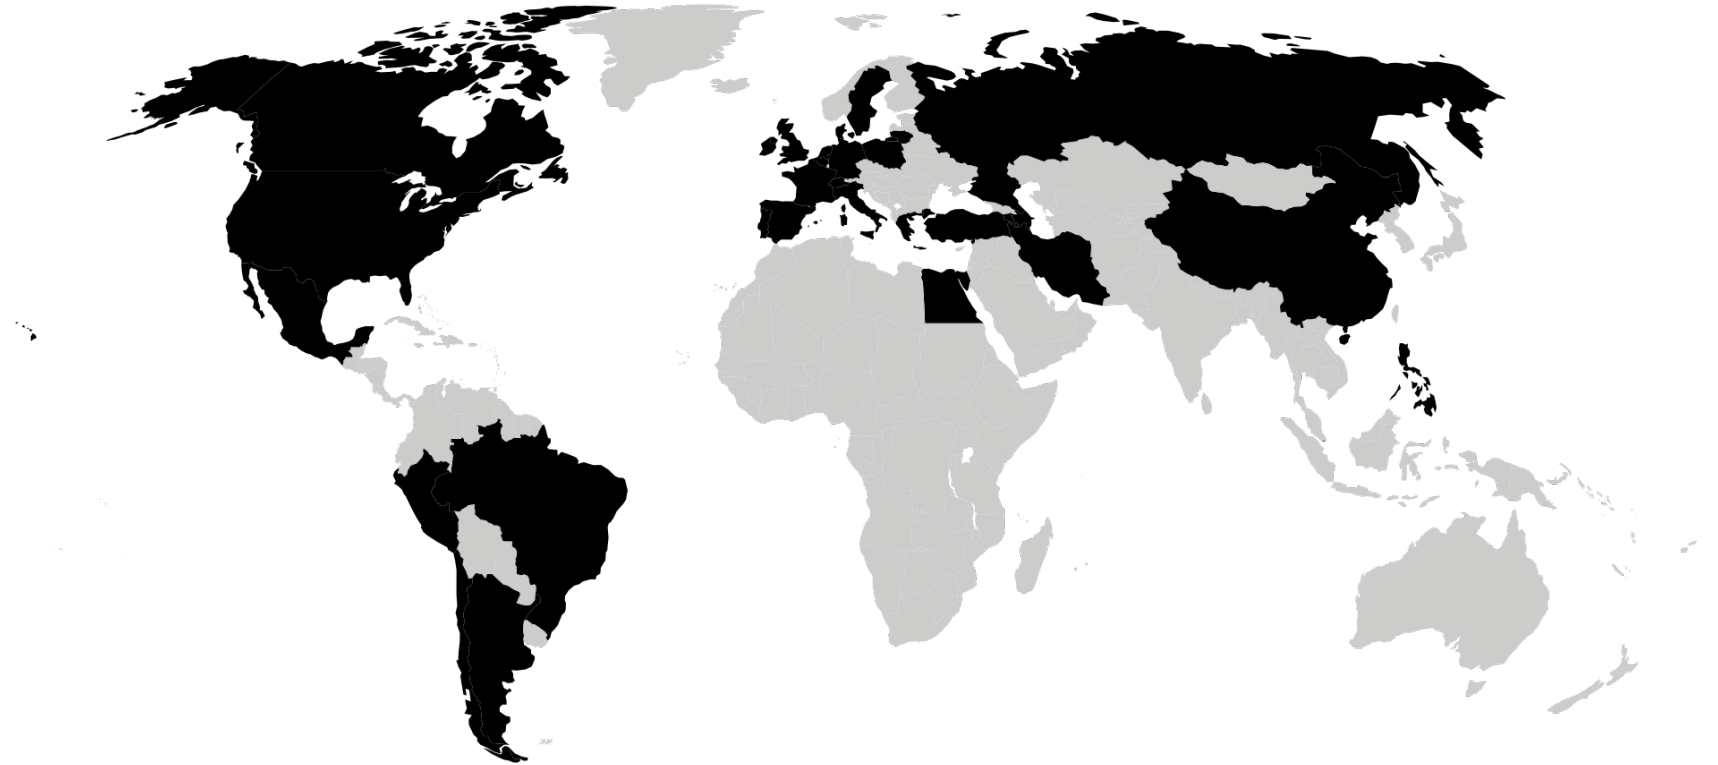

**Fig. S2.** World map showing countries contributing patients with CLD and SARS-CoV-2 infection between 25th March and 8th July 2020 which were included in the final analysis.

**Fig. S3 – Accuracy of prognostic scores in predicting mortality in patients with cirrhosis**

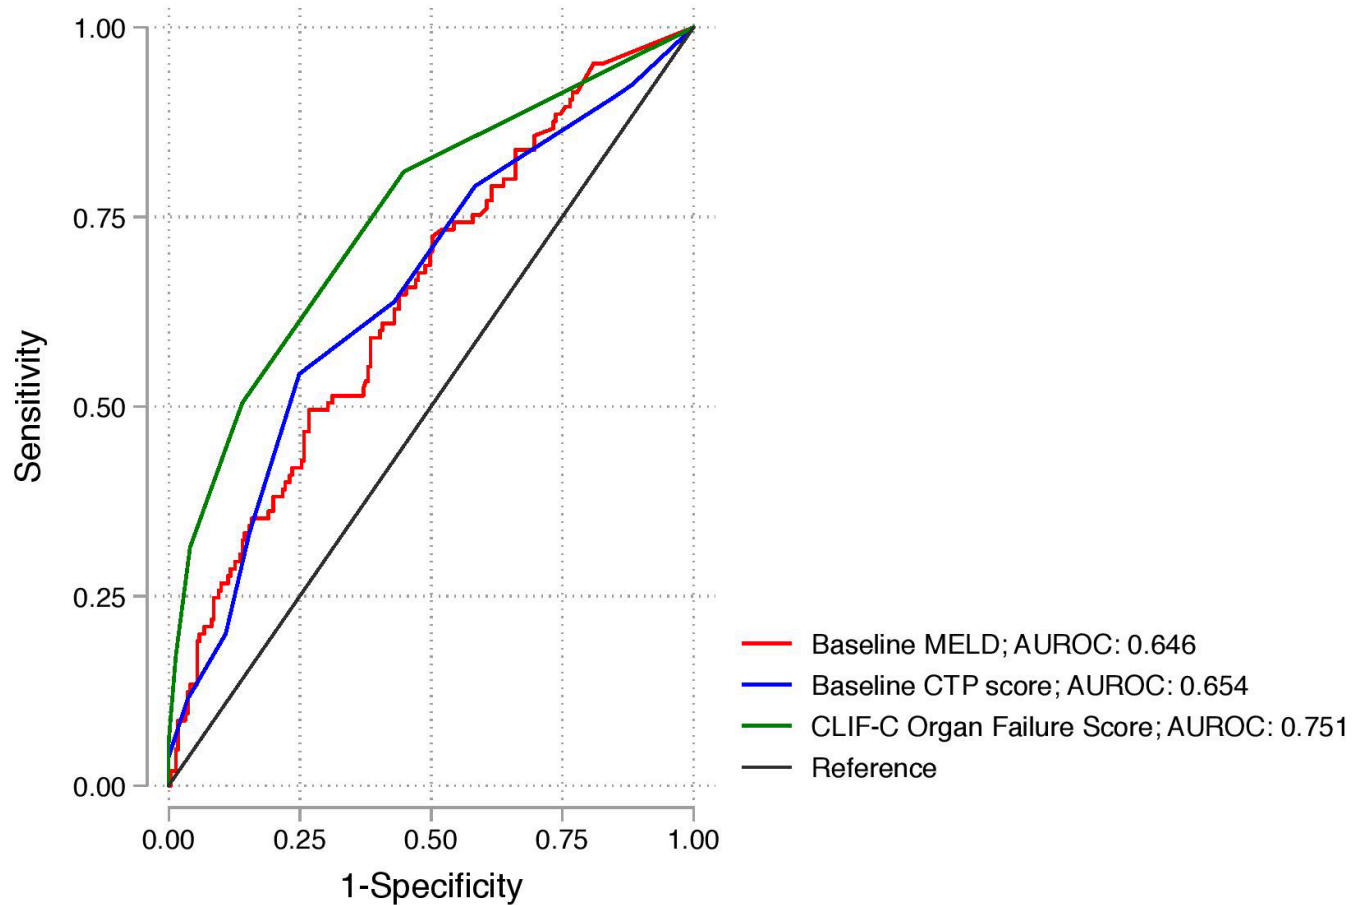

**Fig. S3.** Receiver operating characteristic (ROC) curves and the area under the curve (AUC) to determine the score accuracy of baseline CTP score, baseline MELD, and CLIF-C organ failure score as predictors of mortality following SARS-CoV-2 in patients with cirrhosis. AUC of baseline CTP score, baseline MELD, and CLIF-C organ failure score were 0.65, 0.64, and 0.75 respectively.

**Table S1 – Submitting countries**

| <b>Country</b> | <b>Submissions</b> | <b>Percentage</b> |
|----------------|--------------------|-------------------|
| UK             | 184                | 24.7              |
| USA            | 183                | 24.6              |
| China          | 118                | 15.8              |
| Spain          | 63                 | 8.5               |
| Singapore      | 30                 | 4.0               |
| Egypt          | 29                 | 3.9               |
| Mexico         | 27                 | 3.6               |
| Iran           | 18                 | 2.4               |
| Turkey         | 14                 | 1.9               |
| Italy          | 13                 | 1.7               |
| Sweden         | 11                 | 1.5               |
| Belgium        | 8                  | 1.1               |
| Germany        | 8                  | 1.1               |
| Canada         | 6                  | 0.8               |
| Azerbaijan     | 5                  | 0.7               |
| France         | 5                  | 0.7               |
| Peru           | 5                  | 0.7               |
| Lithuania      | 3                  | 0.4               |
| Argentina      | 2                  | 0.3               |
| Brazil         | 2                  | 0.3               |
| Ireland        | 2                  | 0.3               |
| Portugal       | 2                  | 0.3               |
| Armenia        | 1                  | 0.1               |
| Chile          | 1                  | 0.1               |
| Denmark        | 1                  | 0.1               |
| Greece         | 1                  | 0.1               |
| Philippines    | 1                  | 0.1               |
| Poland         | 1                  | 0.1               |
| Russia         | 1                  | 0.1               |

**Table S1.** List of all countries contributing cases which were included in final analyses.

**Table S2 – List of CLD aetiologies**

| <b>Aetiology</b>    | <b>Cases</b> | <b>Percentage</b> |
|---------------------|--------------|-------------------|
| NAFLD               | 286          | 38.4              |
| Alcohol             | 133          | 17.9              |
| HBV                 | 75           | 10.1              |
| HCV                 | 63           | 8.5               |
| Other               | 43           | 5.8               |
| AIH                 | 42           | 5.6               |
| Alcohol HCV         | 23           | 3.1               |
| NAFLD Alcohol       | 15           | 2.0               |
| NAFLD HBV           | 10           | 1.3               |
| AIH PBC             | 7            | 0.9               |
| PSC                 | 7            | 0.9               |
| HFE                 | 6            | 0.8               |
| PBC                 | 5            | 0.7               |
| Alcohol Other       | 4            | 0.5               |
| NAFLD HCV           | 4            | 0.5               |
| HCV HBV             | 3            | 0.4               |
| AIH PSC             | 2            | 0.3               |
| Alcohol HBV         | 2            | 0.3               |
| HBV Other           | 2            | 0.3               |
| NAFLD AIH           | 2            | 0.3               |
| NAFLD Other         | 2            | 0.3               |
| AIH PSC IGG4        | 1            | 0.1               |
| Alcohol AIH         | 1            | 0.1               |
| HCV HFE             | 1            | 0.1               |
| HCV Other           | 1            | 0.1               |
| NAFLD Alcohol Other | 1            | 0.1               |
| NAFLD HCV Other     | 1            | 0.1               |
| NAFLD IGG4          | 1            | 0.1               |
| PSC IGG4            | 1            | 0.1               |
| Wilson              | 1            | 0.1               |

**Table S2.** List and relative proportions of CLD aetiologies (and combination of aetiologies) for cases included in the final analyses. NAFLD = non-alcoholic fatty liver disease; HBV = chronic hepatitis B virus infection; HCV = chronic hepatitis C virus infection; AIH = autoimmune hepatitis; PSC = primary sclerosing cholangitis; HFE = HFE-related hereditary haemochromatosis; PBC = primary biliary cholangitis; IGG4 = IgG4 related disease

**Table S3 – Patient characteristics of the total CLD cohort compared to the non-CLD cohort.**

|                              | <b>CLD</b>    | <b>Non-CLD</b> | <b>p value</b>   |
|------------------------------|---------------|----------------|------------------|
|                              | n = 745       | n = 620        |                  |
| <b><i>Demographics</i></b>   |               |                |                  |
| <b>Age (years)</b>           | 59 (47-68)    | 73 (55-84)     | <b>&lt;0.001</b> |
| <b>Sex (male)</b>            | 465 (62%)     | 324 (52%)      | <b>&lt;0.001</b> |
| <b>Ethnicity (white)</b>     | 363 (49%)     | 426 (69%)      | <b>&lt;0.001</b> |
|                              |               |                |                  |
| <b><i>Co-factors</i></b>     |               |                |                  |
| <b>Smoker</b>                | 51 (7%)       | 7 (1%)         | <b>&lt;0.001</b> |
| <b>Obesity</b>               | 207 (28%)     | 155 (25%)      | 0.268            |
| <b>Heart disease</b>         | 146 (20%)     | 198 (32%)      | <b>&lt;0.001</b> |
| <b>Diabetes mellitus</b>     | 142 (23%)     | 274 (37%)      | <b>&lt;0.001</b> |
| <b>Hypertension</b>          | 303 (41%)     | 235 (38%)      | 0.317            |
| <b>COPD</b>                  | 56 (8%)       | 41 (7%)        | 0.528            |
| <b>Non HCC cancer</b>        | 68 (11%)      | 42 (6%)        | <b>&lt;0.001</b> |
| <b>HCC</b>                   | 48 (6%)       | 0 (0%)         | <b>&lt;0.001</b> |
| <b>Creatinine (mg/dl)</b>    | 0.9 (0.7-1.0) | 0.9 (0.7-1.1)  | <b>0.021</b>     |
|                              |               |                |                  |
| <b><i>Major outcomes</i></b> |               |                |                  |
| <b>Hospitalisation</b>       | 668 (90%)     | 467 (75%)      | <b>&lt;0.001</b> |
| <b>ICU requirement</b>       | 235 (32%)     | 179 (29%)      | 0.288            |
| <b>ICU admission</b>         | 177 (24%)     | 51 (8%)        | <b>&lt;0.001</b> |
| <b>RRT</b>                   | 32 (4%)       | 2 (0%)         | <b>&lt;0.001</b> |
| <b>Ventilation</b>           | 132 (18%)     | 31 (5%)        | <b>&lt;0.001</b> |
| <b>Death</b>                 | 150 (25%)     | 160 (26%)      | <b>0.014</b>     |

**Table S3.** Demographics, co-factors and major outcomes for the total CLD and non-CLD cohorts. HCC = hepatocellular carcinoma; COPD = chronic obstructive pulmonary disease; ICU = intensive care unit; RRT = new requirement for renal replacement therapy.

**Table S4 – Target antiviral treatments used in the CLD cohort.**

|                                 | <b>Total CLD cohort</b> | <b>CLD without cirrhosis</b> | <b>CLD with cirrhosis</b> |
|---------------------------------|-------------------------|------------------------------|---------------------------|
| <b>Drug</b>                     | <b>n=745</b>            | <b>n=359</b>                 | <b>n=386</b>              |
| Hydroxychloroquine              | 162 (22%)               | 78 (22%)                     | 84 (22%)                  |
| Lopinovir/Ritonavir             | 114 (15%)               | 95 (26%)                     | 19 (5%)                   |
| Interferon alpha                | 69 (9%)                 | 64 (18%)                     | 5 (1%)                    |
| Remdesivir                      | 21 (3%)                 | 8 (2%)                       | 13 (3%)                   |
| Azithromycin                    | 21 (3%)                 | 15 (4%)                      | 6 (2%)                    |
| Anti-IL6 therapy                | 17 (2%)                 | 12 (3%)                      | 5 (1%)                    |
| Umifenovir                      | 16 (2%)                 | 6 (2%)                       | 10 (3%)                   |
| Oseltamivir                     | 9 (1%)                  | 1 (<1%)                      | 8 (2%)                    |
| Corticosteroids                 | 6 (1%)                  | 6 (2%)                       | 0                         |
| Convalescent plasma             | 6 (1%)                  | 3 (1%)                       | 3 (1%)                    |
| Favipiravir                     | 6 (6%)                  | 3 (1%)                       | 3 (1%)                    |
| Ribavirin                       | 3 (<1%)                 | 2 (1%)                       | 1 (<1%)                   |
| Interferon beta                 | 3 (<1%)                 | 3 (1%)                       | 0                         |
| Darunavir/cobicistat            | 2 (<1%)                 | 1 (<1%)                      | 1 (<1%)                   |
| Dolutegravir                    | 1 (<1%)                 | 0                            | 1 (<1%)                   |
| Anakinra                        | 1 (<1%)                 | 1 (<1%)                      | 0                         |
| Any targeted COVID-19 treatment | 315 (42%)               | 186 (52%)                    | 129 (33%)                 |

**Table S4.** List of all targeted antiviral treatments used in the total cohort of patients with CLD and laboratory proven SARS-CoV-2 infection separated into those with and without cirrhosis.



**Table S5 – Patient characteristics separated by stage of liver disease**

|                              | <b>CLD without cirrhosis</b> | <b>CTP-A</b>  | <b>CTP-B</b>  | <b>CTP-C</b>  |
|------------------------------|------------------------------|---------------|---------------|---------------|
|                              | n=359                        | n=171         | n=124         | n=91          |
| <i><b>Demographics</b></i>   |                              |               |               |               |
| <b>Age (years)</b>           | 55 (43-66)                   | 64 (54-73)    | 62 (54-68)    | 58 (48-63)    |
| <b>Sex (male)</b>            | 216 (60%)                    | 104 (61%)     | 84 (68%)      | 61 (67%)      |
| <b>Ethnicity (white)</b>     | 124 (35%)                    | 98 (57%)      | 80 (65%)      | 61 (67%)      |
| <i><b>Aetiology</b></i>      |                              |               |               |               |
| <b>NAFLD</b>                 | 220 (62%)                    | 55 (32%)      | 32 (26%)      | 15 (16%)      |
| <b>ALD</b>                   | 21 (6%)                      | 46 (27%)      | 58 (47%)      | 54 (59%)      |
| <b>HBV</b>                   | 55 (15%)                     | 27 (16%)      | 5 (4%)        | 5 (5%)        |
| <b>HCV</b>                   | 24 (7%)                      | 37 (22%)      | 25 (20%)      | 10 (11%)      |
| <i><b>Co-factors</b></i>     |                              |               |               |               |
| <b>Smoker</b>                | 15 (4%)                      | 13 (8%)       | 11 (9%)       | 12 (13%)      |
| <b>Obesity</b>               | 103 (29%)                    | 48 (28%)      | 34 (27%)      | 22 (24%)      |
| <b>Heart disease</b>         | 49 (14%)                     | 49 (29%)      | 33 (27%)      | 15 (16%)      |
| <b>Diabetes mellitus</b>     | 123 (34%)                    | 76 (44%)      | 51 (41%)      | 24 (26%)      |
| <b>Hypertension</b>          | 143 (40%)                    | 75 (44%)      | 53 (43%)      | 32 (35%)      |
| <b>COPD</b>                  | 22 (6%)                      | 12 (7%)       | 13 (10%)      | 9 (10%)       |
| <b>HCC</b>                   | 2 (1%)                       | 30 (18%)      | 9 (7%)        | 7 (8%)        |
| <b>Non-HCC malignancy</b>    | 15 (4%)                      | 15 (9%)       | 8 (7%)        | 4 (4%)        |
| <b>Creatinine (mg/dl)</b>    | 0.8 (0.7-1.0)                | 0.8 (0.6-1.0) | 0.9 (0.7-1.4) | 0.9 (0.7-1.2) |
| <i><b>Major outcomes</b></i> |                              |               |               |               |
| <b>Hospitalisation</b>       | 323 (90%)                    | 150 (88%)     | 111 (90%)     | 84 (92%)      |
| <b>ICU requirement</b>       | 80 (22%)                     | 57 (33%)      | 48 (39%)      | 50 (55%)      |
| <b>ICU admission</b>         | 69 (19%)                     | 40 (23%)      | 34 (27%)      | 34 (37%)      |
| <b>RRT</b>                   | 11 (3%)                      | 4 (2%)        | 6 (5%)        | 11 (12%)      |
| <b>Invasive ventilation</b>  | 61 (17%)                     | 27 (16%)      | 23 (19%)      | 21 (23%)      |
| <b>Death</b>                 | 27 (8%)                      | 33 (19%)      | 44 (35%)      | 46 (51%)      |

**Table S5.** Demographics, liver disease aetiology, co-factors and major outcomes for all 745 CLD patients separated according to liver disease stage (CLD without cirrhosis, CTP-A, CTP-B and CTP-C cirrhosis). NAFLD = non-alcoholic fatty liver disease; ALD = alcohol related liver disease; HBV = chronic hepatitis B virus infection; HCV = chronic hepatitis C virus infection; HCC = hepatocellular carcinoma; COPD = chronic obstructive pulmonary disease; RRT = new requirement for renal replacement therapy.

**Table S6 – Patient characteristics of cirrhosis cohort and factors associated with death following SARS-CoV-2 infection**

| Variable           | Cohort      |           | Survived    |           | Died        |           | Univariable      |        | Multivariable 1  |                  | Multivariable 2  |                  |
|--------------------|-------------|-----------|-------------|-----------|-------------|-----------|------------------|--------|------------------|------------------|------------------|------------------|
|                    | n or median | % or IQR  | n or median | % or IQR  | n or median | % or IQR  | OR (95%CI)       | p      | OR (95%CI)       | p                | OR (95%CI)       | p                |
|                    | n=386       |           | n=263       |           | n=123       |           |                  |        |                  |                  |                  |                  |
| Age (years)        | 61          | (53–70)   | 62          | (50–70)   | 61          | (54–71)   | 1.00 (0.99–1.02) | 0.549  | 1.02 (0.99–1.04) | 0.157            | 1.02 (0.99–1.04) | 0.166            |
| Sex (male)         | 239         | 59%       | 155         | 59%       | 84          | 68%       | 0.84 (0.54–1.31) | 0.445  | 0.68 (0.40–1.15) | 0.151            | 0.76 (0.44–1.29) | 0.305            |
| Ethnicity (white)  | 249         | 66%       | 173         | 66%       | 76          | 62%       | 0.84 (0.35–2.06) | 0.708  | 1.31 (0.77–2.20) | 0.317            | 1.39 (0.81–2.40) | 0.238            |
| CTP A              | 171         | 52%       | 138         | 52%       | 33          | 27%       | 1.00 (REF)       | <0.001 | 1.00 (REF)       | -                | -                | -                |
| CTP B              | 124         | 30%       | 80          | 30%       | 44          | 36%       | 2.30 (1.36–3.90) | 0.002  | 2.19 (1.21–3.96) | <b>0.009</b>     | -                | -                |
| CTP C              | 91          | 17%       | 45          | 17%       | 46          | 37%       | 4.27 (2.44–7.48) | <0.001 | 4.60 (2.41–8.79) | <b>&lt;0.001</b> | -                | -                |
| MELD               | 12          | (8–19)    | 19          | (7–17)    | 7           | (9–23)    | 1.07 (1.03–1.10) | <0.001 | -                | -                | 1.07 (1.03–1.11) | <b>&lt;0.001</b> |
| NAFLD              | 102         | 26%       | 69          | 26%       | 33          | 27%       | 1.03 (0.64–1.67) | 0.902  | 0.99 (0.50–1.95) | 0.966            | 0.81 (0.40–1.65) | 0.570            |
| ARLD               | 158         | 38%       | 99          | 38%       | 59          | 48%       | 1.53 (0.99–2.35) | 0.055  | 1.51 (0.82–2.77) | 0.184            | 1.41 (0.75–2.64) | 0.281            |
| HBV                | 72          | 21%       | 54          | 21%       | 18          | 15%       | 0.56 (0.25–1.27) | 0.164  | 0.98 (0.36–2.69) | 0.972            | 0.84 (0.31–2.27) | 0.733            |
| HCV                | 37          | 11%       | 29          | 11%       | 8           | 7%        | 0.66 (0.37–1.19) | 0.168  | 0.84 (0.42–1.70) | 0.631            | 0.75 (0.36–1.60) | 0.463            |
| Smoker             | 36          | 10%       | 27          | 10%       | 9           | 7%        | 0.69 (0.31–1.52) | 0.355  | 0.60 (0.24–1.50) | 0.278            | 0.71 (0.29–1.77) | 0.467            |
| Obesity            | 104         | 24%       | 64          | 24%       | 40          | 33%       | 1.50 (0.94–2.40) | 0.092  | 1.54 (0.90–2.65) | 0.116            | 1.55 (0.88–2.73) | 0.129            |
| Heart disease      | 97          | 26%       | 69          | 26%       | 28          | 23%       | 0.83 (0.50–1.37) | 0.464  | 0.72 (0.39–1.32) | 0.293            | 0.65 (0.34–1.23) | 0.183            |
| Diabetes mellitus  | 151         | 38%       | 100         | 38%       | 51          | 41%       | 1.15 (0.75–1.79) | 0.519  | 1.23 (0.71–2.13) | 0.456            | 1.27 (0.72–2.24) | 0.418            |
| Hypertension       | 160         | 40%       | 105         | 40%       | 55          | 45%       | 1.22 (0.79–1.88) | 0.374  | 1.21 (0.71–2.06) | 0.477            | 1.52 (0.88–2.64) | 0.132            |
| COPD               | 34          | 9%        | 24          | 9%        | 10          | 8%        | 0.88 (0.41–1.91) | 0.748  | 0.79 (0.32–1.95) | 0.612            | 0.71 (0.27–1.89) | 0.496            |
| Non-HCC cancer     | 70          | 18%       | 48          | 18%       | 22          | 18%       | 1.28 (0.57–2.89) | 0.551  | 1.56 (0.64–3.82) | 0.331            | 1.71 (0.69–4.19) | 0.244            |
| HCC                | 46          | 13%       | 33          | 13%       | 13          | 11%       | 0.82 (0.42–1.63) | 0.577  | 1.21 (0.55–2.64) | 0.638            | 1.13 (0.49–2.60) | 0.774            |
| Creatinine (mg/dl) | 0.9         | (0.7–1.1) | 1.1         | (0.7–1.1) | 0.7         | (0.7–1.3) | 1.15 (0.95–1.37) | 0.145  | 1.09 (0.89–1.34) | 0.398            | -                | -                |

**Table S6.** Patient characteristics of patients with cirrhosis and laboratory-confirmed SARS-CoV-2 infection. Univariable associations with death and associated *p* values assessed by logistic regression. Multivariable analysis for association with death performed using logistic regression including all variables. Multivariable 1 includes CTP class, comparing with CTP-A as the reference. Multivariable 2 includes MELD and therefore excludes creatinine as an independent variable. No additional variables were significantly associated with death after

sensitivity analysis using stepwise backwards selection at  $p < 0.2$ . CI = confidence interval; IQR = interquartile range; CTP = Child-Turcotte-Pugh; NAFLD = non-alcoholic fatty liver disease; ALD = Alcohol related liver disease; HBV = chronic hepatitis B virus infection; HCV = chronic hepatitis C virus infection; COPD = chronic obstructive pulmonary disease; HCC = hepatocellular carcinoma; MELD = model for end stage liver disease.

**Table S7 - Patient characteristics after propensity score matching.**

|                           | Total cohort          |                 |                 |                 |                 |                 |                 |                 |
|---------------------------|-----------------------|-----------------|-----------------|-----------------|-----------------|-----------------|-----------------|-----------------|
|                           | CLD without cirrhosis |                 | CTP-A cirrhosis |                 | CTP-B cirrhosis |                 | CTP-C cirrhosis |                 |
|                           | Disease               | Matched non-CLD | Disease         | Matched non-CLD | Disease         | Matched non-CLD | Disease         | Matched non-CLD |
| <b>n</b>                  | 359                   | 359             | 171             | 171             | 124             | 124             | 91              | 91              |
| <i>Demographics</i>       |                       |                 |                 |                 |                 |                 |                 |                 |
| <b>Age (years)</b>        | 55 (43–67)            | 54 (53–64)      | 64 (54–73)      | 61 (52–74)      | 62 (54–68)      | 60 (54–69)      | 58 (48–63)      | 58 (48–65)      |
| <b>Sex (male)</b>         | 216 (60%)             | 217 (60%)       | 104 (61%)       | 114 (67%)       | 84 (68%)        | 89 (72%)        | 61 (67%)        | 59 (65%)        |
| <b>Ethnicity (white)</b>  | 124 (35%)             | 202 (56%)       | 98 (57%)        | 110 (64%)       | 80 (65%)        | 75 (60%)        | 61 (67%)        | 52 (57%)        |
| <i>Co-factors</i>         |                       |                 |                 |                 |                 |                 |                 |                 |
| <b>Smoker</b>             | 15 (4%)               | 1 (0%)          | 13 (8%)         | 2 (1%)          | 11 (9%)         | 0 (0%)          | 12 (13%)        | 2 (2%)          |
| <b>Obesity</b>            | 103 (29%)             | 93 (26%)        | 48 (28%)        | 54 (32%)        | 34 (27%)        | 34 (27%)        | 22 (24%)        | 24 (26%)        |
| <b>Heart disease</b>      | 49 (14%)              | 39 (11%)        | 49 (29%)        | 49 (29%)        | 33 (27%)        | 30 (24%)        | 15 (16%)        | 14 (15%)        |
| <b>Diabetes mellitus</b>  | 123 (34%)             | 105 (29%)       | 76 (44%)        | 73 (43%)        | 51 (41%)        | 41 (33%)        | 24 (26%)        | 28 (31%)        |
| <b>Hypertension</b>       | 143 (40%)             | 113 (31%)       | 75 (44%)        | 60 (35%)        | 53 (43%)        | 33 (26%)        | 32 (35%)        | 35 (38%)        |
| <b>COPD</b>               | 22 (6%)               | 10 (3%)         | 12 (7%)         | 8 (5%)          | 13 (10%)        | 15 (12%)        | 9 (10%)         | 8 (9%)          |
| <b>HCC</b>                | 2 (1%)                | 0 (0%)          | 30 (18%)        | 0 (0%)          | 9 (7%)          | 0 (0%)          | 7 (8%)          | 0 (0%)          |
| <b>Non-HCC cancer</b>     | 15 (4%)               | 28 (8%)         | 15 (9%)         | 14 (8%)         | 8 (6%)          | 13 (10%)        | 4 (4%)          | 7 (7%)          |
| <b>Creatinine (mg/dL)</b> | 0.8 (0.7–1.0)         | 0.8 (0.7–1.0)   | 0.8 (0.6–1.0)   | 0.9 (0.7–1.1)   | 0.9 (0.7–1.4)   | 0.9 (0.8–1.0)   | 0.9 (0.7–1.2)   | 0.9 (0.8–1.1)   |

|                           | UK cohort             |                 |                 |                 |                 |                 |                 |                 |
|---------------------------|-----------------------|-----------------|-----------------|-----------------|-----------------|-----------------|-----------------|-----------------|
|                           | CLD without cirrhosis |                 | CTP-A cirrhosis |                 | CTP-B cirrhosis |                 | CTP-C cirrhosis |                 |
|                           | Disease               | Matched non-CLD | Disease         | Matched non-CLD | Disease         | Matched non-CLD | Disease         | Matched non-CLD |
| <b>n</b>                  | 81                    | 81              | 38              | 38              | 37              | 37              | 28              | 28              |
| <i>Demographics</i>       |                       |                 |                 |                 |                 |                 |                 |                 |
| <b>Age (years)</b>        | 62 (49–76)            | 61 (50–72)      | 63 (54–75)      | 64 (56–75)      | 66 (57–73)      | 65 (57–75)      | 58 (51–64)      | 59 (51–65)      |
| <b>Sex (male)</b>         | 44 (54%)              | 41 (51%)        | 23 (61%)        | 26 (68%)        | 24 (65%)        | 22 (59%)        | 21 (75%)        | 22 (79%)        |
| <b>Ethnicity (white)</b>  | 43 (53%)              | 53 (65%)        | 29 (79%)        | 24 (63%)        | 30 (81%)        | 22 (59%)        | 25 (89%)        | 14 (50%)        |
| <i>Co-factors</i>         |                       |                 |                 |                 |                 |                 |                 |                 |
| <b>Smoker</b>             | 3 (4%)                | 1 (1%)          | 5 (13%)         | 1 (3%)          | 5 (14%)         | 0 (0%)          | 4 (14%)         | 0 (0%)          |
| <b>Obesity</b>            | 20 (25%)              | 20 (25%)        | 13 (34%)        | 15 (39%)        | 11 (30%)        | 11 (30%)        | 6 (21%)         | 8 (29%)         |
| <b>Heart disease</b>      | 23 (28%)              | 17 (21%)        | 15 (39%)        | 18 (47%)        | 12 (32%)        | 10 (27%)        | 3 (11%)         | 4 (14%)         |
| <b>Diabetes mellitus</b>  | 37 (46%)              | 36 (44%)        | 21 (55%)        | 20 (53%)        | 15 (41%)        | 15 (41%)        | 6 (21%)         | 10 (36%)        |
| <b>Hypertension</b>       | 34 (42%)              | 28 (35%)        | 12 (32%)        | 16 (42%)        | 12 (32%)        | 13 (35%)        | 9 (32%)         | 11 (39%)        |
| <b>COPD</b>               | 10 (12%)              | 7 (9%)          | 5 (13%)         | 4 (11%)         | 3 (8%)          | 2 (5%)          | 5 (18%)         | 6 (21%)         |
| <b>HCC</b>                | 0 (0%)                | 0 (0%)          | 6 (16%)         | 0 (0%)          | 2 (5%)          | 0 (0%)          | 0 (0%)          | 0 (0%)          |
| <b>Non-HCC cancer</b>     | 3 (4%)                | 7 (9%)          | 4 (11%)         | 1 (3%)          | 3 (8%)          | 6 (16%)         | 1 (4%)          | 2 (7%)          |
| <b>Creatinine (mg/dL)</b> | 0.9 (0.7–1.0)         | 0.8 (0.7–1.0)   | 0.9 (0.7–1.0)   | 0.9 (0.7–1.1)   | 1.0 (0.7–1.4)   | 0.9 (0.7–1.3)   | 0.8 (0.6–1.1)   | 0.9 (0.8–1.0)   |

**Table S7.** Table shows the baseline patient characteristics for each liver disease stage after performing propensity score matching to non-CLD patients. Matching data is presented for both the total CLD cohort and when restricted to UK CLD cases. Variables selected for propensity score matching were age in years, interactions with age, sex, COPD, diabetes mellitus, and heart disease. HCC = hepatocellular carcinoma; COPD = chronic obstructive pulmonary disease; CTP = Child-Turcotte-Pugh

## Table S8 – Full list of all contributing clinicians and centres of CLD patients included in final analysis

List of contributors, with thanks; (submitting clinician, responsible consultant, centre, country)

Abigail Ford & Matthew Hoare, Cambridge University Hospitals NHS Foundation Trust, UK

Ahad Eshraghian, Avicenna Center for Medicine and Organ Transplant, Iran

Ahmed Hashim & David Patch, Royal Free Hospital, UK

Ahmed Hashim & Jonathan Potts, Royal Free Hospital, UK

Ahmed Hashim & William Rosenburg, Royal Free Hospital, UK

Ahmed Hashim & Raj Mokerjee, Royal Free Hospital, UK

Ahmed Hashim & Rajiv Jalan, Royal Free Hospital, UK

Ahmed Tawheed & Mohamed el Kassas, Endemic Medicine Department, Helwan University, Egypt

Alvaro Urzua, Hospital Clinico Universidad de Chile, Chile

Andrew Austin, Royal Derby Hospital, UK

Andrew Moon & A Sidney Barritt, University of North Carolina, USA

Andrew Moon, University of North Carolina, USA

Andrew Moon & Cary Cotton, University of North Carolina, USA

Andrew Moon & Scott Elliott, University of North Carolina, USA

Andrew Yeoman, Gwent Liver Unit, Royal Gwent Hospital, UK

Ane Soegaard Teisner, Herlev Hospital, Denmark

Anna Crawford & Jane Collier, Oxford University Hospitals, UK

Antonella Putignano & Thierry Gustot, CUB-Erasme, Université Libre de Bruxelles, Belgium

aren nersisyan, Mikayelyan Institute of Surgery, Armenia

Ben Hudson, Royal Devon and Exeter NHS Foundation Trust, UK

Benjamin Mullish & Nowlan Selvapatt, St Mary's Hospital, UK

Bethany Robinson & Emilie Wilkes, Nottingham University Hospitals NHS Trust, UK

Bethany Robinson & Neil Guha, Nottingham University Hospitals NHS Trust, UK

Bo Wang & Annika Charlesworth, University Hospital Lewisham, UK

Boris Yaremin & Murad Novruzbekov, Sklifosovsky Emergency Medicine Institute, Russia

Bruno Annibale & Massimo Marignani, Digestive and Liver Disease Unit, Sant'Andrea Hospital, 'Sapienza' University of Rome, Rome, Italy

Bulent Baran & Cihan Yurdaydin, Koç University Hospital, Turkey

Carmen Cerron & Martin Padilla, Transplant Department, Hospital Guillermo Almenara, Lima, Peru  
Catalina Toledo & Joan Genescà, Hospital vall d'Hebron, Spain  
Charmaine Matthews & Paul Richardson, Liverpool University Hospitals NHS Foundation Trust, UK  
Charmaine Matthews, Liverpool University Hospitals NHS Foundation Trust, UK  
Christina Levick & Andrew Fowell, Queen Alexandra Hospital, Portsmouth, UK  
Christina Levick & Richard Aspinall, Queen Alexandra Hospital, Portsmouth, UK  
Colin Smith, Inspira Medical Center Mullica Hill, USA  
Costica Aloman, Rush University Medical Center, USA  
Costica Aloman & Donald Jensen, Rush University Medical Center, USA  
Costica Aloman & Justin Mitchell, Rush University Medical Center, USA  
Costica Aloman & Nikunj Shah, Rush University Medical Center, USA  
Costica Aloman & Sheila Eswaran, Rush University Medical Center, USA  
Costica Aloman & Sujit Janardhan, Rush University Medical Center, USA  
Costica Aloman & Nancy Reau, Rush University Medical Center, USA  
Cristina Fernández Marcos & Martin Prieto, hospital universitaria la fe valencia, Spain  
Cristina Fernández Marcos, Hospital Universitario de Burgos, Spain  
Cristina Fernández Marcos & Martin Prieto, Hospital Universitario y Politécnico de La Fe, Valencia, Spain  
Cristina Rigamonti, Department of Translational Medicine, Università del Piemonte Orientale UPO, Novara, Italy  
Cristina Rigamonti, Azienda Ospedaliero Universitaria Maggiore della Carità, Novara, Italy  
Daniele Nicolini & Marco Vivarelli, Università Politecnica delle Marche, Ancona, Italy  
David Harman & Jane Collier, Oxford University Hospitals, UK  
David Wong, Toronto General Hospital, Canada  
Debbie Shawcross & Aluvihare/Suddle/Shawcross/Heneghan, king's College Hospital, London, UK  
Debbie Shawcross & Michael Heneghan, king's College Hospital, London, UK  
Debbie Shawcross, king's College Hospital, London, UK  
Devina Bhasin, piedmont transplant institute, USA  
Dominik Bettinger & Robert Thimme, University Medical Center Freiburg, Germany  
Eabha Ring & Steve Stewart, Mater University Hospital, Dublin, Ireland  
Emily Glynn & John Ryan, Beaumont Hospital, Ireland  
Emma Avitabile & Alejandro Forner Gonzalez, Hospital Clinic de Barcelona, Spain  
Emma Avitabile & Elsa Sola Verges, Hospital Clinic de Barcelona, Spain



Emma Avitabile & Isabel Graupera Garcia, Hospital Clinic de Barcelona, Spain  
Emma Avitabile & Zoe Mariño, Hospital Clinic de Barcelona, Spain  
Emma Avitabile & Maria Martinez Rebollar, Hospital Clinic de Barcelona, Spain  
Emma Avitabile & Albert Parés, Hospital Clinic de Barcelona, Spain  
Emma Avitabile & Cristina Sole Marti, Hospital Clinic de Barcelona, Spain  
Emma Avitabile & Elisa Pose, Hospital Clinic de Barcelona, Spain  
Emma Avitabile & Marco Sanduzzi Zamparelli, Hospital Clinic de Barcelona, Spain  
Emma Avitabile & Maria Carlota Londoño Hurtado, Hospital Clinic de Barcelona, Spain  
Emma Avitabile & Pere Ginès, Hospital Clinic de Barcelona, Spain  
Emma Avitabile & Xavier Fornas, Hospital Clinic de Barcelona, Spain  
Emma Avitabile, Hospital Clinic de Barcelona, Spain  
Esteban Fuentes Valenzuela & Julia Gomez Barquero, Hospital Universitario Río Hortega, Valladolid, Spain  
Ewan Forrest, Glasgow Royal Infirmary, UK  
Ezequiel Mauro, Hospital Italiano de Buenos Aires, Argentina  
Feng Su & Charles Landis, Harborview Medical Center, Seattle, USA  
Feng Su & Paula Cox-North, Harborview Medical Center, Seattle, USA  
Feng Su, Harborview Medical Center, Seattle, USA  
Feng Su & Michele Goodman, University of Washington Northwest Hospital, USA  
Filipa Bordalo Ferreira & Maria Luísa Figueiredo, Hospital Professor Doutor Fernando Fonseca, Portugal  
Francesca Saffioti & Jeremy Cobbold, Oxford University Hospitals, UK  
Francesca Saffioti, Oxford University Hospitals, UK  
Gabriel Aballay Soteras, El Instituto de Trasplantes de Alta Complejidad, Argentina  
Gloria Torres & Joan Genescà, Hospital vall d'Hebron, Spain  
Gupse Adali, University of Health Sciences Umraniye Training and Research Hospital, Istanbul, Turkey  
Gustav Buescher & Christoph Schramm, University Medical Center Hamburg, Germany  
Gustavo Henrique Santos Pereira, Gastroenterology and Hepatology Unit, Bonsucesso Federal Hospital, Ministry of Health, Rio de Janeiro, Brazil  
Gwilym Webb & Jane Collier, Oxford University Hospitals, UK  
Hannes Hagström, Karolinska University Hospital, Sweden  
Hannes Hagström & Per Stål, Karolinska University Hospital, Sweden  
Hannes Hagström & Mattias Lissing, Karolinska University Hospital, Sweden  
Hannes Hagström & Ammar Barakat, Karolinska University Hospital, Sweden

Hannes Hagström & Annika Bergquist, Karolinska University Hospital, Sweden  
Heather Javaid & Jagadish Nagaraj, Morriston Hospital, Swansea, UK  
Hrishikesh Samant, Ochsner LSU Health Shreveport - Academic Medical Center, Louisiana, USA  
Iain Ewing & Cianan O'Sullivan, Homerton University Hospital, UK  
Iain Ewing, Homerton University Hospital, UK  
Ignacio García Juárez & Jesus a Camacho Escobedo, Hospital Almater, Mexicali, Mexico  
Ignacio García Juárez & Francisco i García-Juárez, Hospital Regional Lic. Adolfo López Mateos - ISSSTE, Mexico  
Ignacio García Juárez, El Instituto Nacional de Ciencias Médicas y Nutrición Salvador Zubirán, Mexico  
Ignacio García Juárez & José a Avila Rojo, El Instituto Nacional de Ciencias Médicas y Nutrición Salvador Zubirán, Mexico  
Ignacio García Juárez & Luis a Estrella Sato, El Instituto Nacional de Ciencias Médicas y Nutrición Salvador Zubirán, Mexico  
Isaac Ruiz & Geneviève Huard, Centre Hospitalier de l'Université de Montréal (CHUM), Canada  
Isaac Ruiz & Hélène Castel, Centre Hospitalier de l'Université de Montréal (CHUM), Canada  
Isaac Ruiz & Julien Bissonnette, Centre Hospitalier de l'Université de Montréal (CHUM), Canada  
Isaac Ruiz & Marc Bilodeau, Centre Hospitalier de l'Université de Montréal (CHUM), Canada  
Isaac Ruiz & Catherine Vincent, Centre Hospitalier de l'Université de Montréal (CHUM), Canada  
James Esteban & Achutan Sourianarayanan, Froedtert and Medical College of Wisconsin, USA  
James Esteban & Aiman Ghufra, Froedtert and Medical College of Wisconsin, USA  
James Esteban & Kia Saeian, Froedtert and Medical College of Wisconsin, USA  
James Esteban & Syed Rizvi, Froedtert and Medical College of Wisconsin, USA  
James Esteban, Froedtert and Medical College of Wisconsin, USA  
Janisha Patel, University Hospital Southampton, UK  
Jihane Benhammou, University of California Los Angeles, USA  
Johnny Cash & Ian Cadden, Royal Victoria Hospital, Belfast, UK  
Jonathan Crisostomo & Arlinking Ong-Go, Metropolitan Medical Center, Philippines  
José Presa, Liver Unit – Centro Hospitalar Trás-os-Montes e Alto Douro, Portugal  
Judith Gomez Camarero & Belen Bernad Cabredo, Hospital Universitario de Burgos, Spain  
Judith Gomez Camarero & Cristina Fernandez Marcos, Hospital Universitario de Burgos, Spain  
Judith Gomez Camarero, Hospital Universitario de Burgos, Spain  
Juozas Kupcinskas, Lithuanian University of Health Sciences, Lithuania  
Justin Boike & Daniel Ganger, Northwestern Memorial Hospital, Chicago, Illinois, USA  
Justin Boike & Laura Kulik, Northwestern Memorial Hospital, Chicago, Illinois, USA

Justin Chin & Kosh Agarwal, King's College Hospital, London, UK  
Justin Chin & Vishal Patel, King's College Hospital, London, UK  
Kate Axe, Gwent Liver Unit, Royal Gwent Hospital, UK  
Katherine Marx & Maria-Andreea Catana, Beth Israel Deaconess Medical Center, USA  
Kevin Korenblat, Washington University School of Medicine, USA  
Konstantina Nikitopoulou & Andrew Johnston, Cambridge University Hospitals NHS Foundation Trust, UK  
Konstantina Nikitopoulou & George Mells, Cambridge University Hospitals NHS Foundation Trust, UK  
Konstantina Nikitopoulou & Joanna Leithead, Cambridge University Hospitals NHS Foundation Trust, UK  
Konstantina Nikitopoulou & Keval Naik, Cambridge University Hospitals NHS Foundation Trust, UK  
Konstantina Nikitopoulou & Michael Allison, Cambridge University Hospitals NHS Foundation Trust, UK  
Konstantina Nikitopoulou & Michalis Kostapanos, Cambridge University Hospitals NHS Foundation Trust, UK  
Konstantina Nikitopoulou & Victoria Snowdon, Cambridge University Hospitals NHS Foundation Trust, UK  
Kuldeep Cheent, Frimley Park Hospital, UK  
Lance Stein, Piedmont Atlanta Hospital, USA  
Leanne Stratton, Royal Victoria Hospital, Belfast, UK  
Logan Hobbs & Craig Lammert, Indiana University Hospital, USA  
Logan Hobbs & Archita Desai, Indiana University Hospital, USA  
Lorraine Blaise & Véronique Grando, Hepatology Unit Jean Verdier Hospital, Bondy , France  
Lorraine Blaise & Elia Gigante, Hepatology Unit Jean Verdier Hospital, Bondy , France  
Lorraine Blaise & Jean Charles Nault, Hepatology Unit Jean Verdier Hospital, Bondy , France  
Lorraine Blaise & Aurélie Walter, Hepatology Unit Jean Verdier Hospital, Bondy , France  
Maciej K Janik & Piotr Milkiewicz, Medical University of Warsaw, Poland  
Marcella Salzano & Joan Genescà, Hospital vall d'Hebron, Spain  
Marco Distefano, UOC Malattie Infettive, Italy  
Maria Fernanda Guerra Veloz, Hospital Universitario Virgen Macarena, Spain  
Maria Fernanda Guerra Veloz & Maria Jose Rios, Hospital Universitario Virgen Macarena, Spain  
Maria Fernanda Guerra Veloz & Patricia Cordero Ruiz, Hospital Universitario Virgen Macarena, Spain  
Maria Torrens & Joan Genescà, Hospital vall d'Hebron, Spain  
Maria-Andreea Catana & Afdhal Nezam, Beth Israel Deaconess Medical Center, USA  
Maria-Andreea Catana & Alan Bonder, Beth Israel Deaconess Medical Center, USA  
Maria-Andreea Catana & Zachary Fricker, Beth Israel Deaconess Medical Center, USA

Maria-Andreea Catana & Lau Daryl, Beth Israel Deaconess Medical Center, USA  
Maria-Andreea Catana, Beth Israel Deaconess Medical Center, USA  
Maria-Andreea Catana & Michael Curry, Beth Israel Deaconess Medical Center, USA  
Maria-Andreea Catana & Michelle Lai, Beth Israel Deaconess Medical Center, USA  
Maria-Andreea Catana & Nezam Afdhal, Beth Israel Deaconess Medical Center, USA  
Maria-Andreea Catana & Patwardhan Vilas, Beth Israel Deaconess Medical Center, USA  
Maria-Andreea Catana & Raza Malik, Beth Israel Deaconess Medical Center, USA  
Maria-Andreea Catana & Tara Ghaziani, Beth Israel Deaconess Medical Center, USA  
Maria-Andreea Catana & Vilas Patwardhan, Beth Israel Deaconess Medical Center, USA  
Maria-Andreea Catana, Boston Medical Center, USA  
Maria-Andreea Catana, Cambridge Health Alliance, USA  
Maria-Andreea Catana & Kathleen Corey, Massachusetts General Hospital, USA  
Martin Prince, Manchester Royal Infirmary, UK  
Mary Kouba & Devina Bhasin, piedmont atlanta hospital, USA  
Matias Estevez Escobar & Cristina Vinolo Ubina, Hospital de Poniente, Spain  
Matias Estevez Escobar, Hospital de Poniente, Spain  
Matthew Armstrong, University Hospitals Birmingham, UK  
Matthew Armstrong & Fiona Thompson, University Hospitals Birmingham, UK  
Matthew McConnell & Cary Caldwell, Yale University, USA  
Mhairi C Donnelly & Mark Hudson, Newcastle Hospitals, UK  
Mhairi C Donnelly, Newcastle Hospitals, UK  
Ming-Hua Zheng, The First Affiliated Hospital of Wenzhou Medical University, China  
Mohamed Elfeki & Jason Kruse, Broadlawns Medical Center, USA  
Mohamed Elfeki & Donald Hillebrand, Iowa Methodist Medical Center, USA  
Mohamed Elfeki, Iowa Methodist Medical Center, USA  
Nancy Reau, Rush University Medical Center, USA  
Nicola Pugliese, Division of Internal Medicine and Hepatology, Department of Gastroenterology, Humanitas Clinical and Research Center IRCCS, Rozzano, Milan, Italy  
Nikolaos K Gatselis & George N Dalekos, University Hospital of Larissa, Greece  
Nneka Ufere & Lizabeth Cline, Boston Medical Center, USA  
Nneka Ufere & Panagiotis Trilianos, Boston Medical Center, USA  
Nneka Ufere, Boston Medical Center, USA

Nneka Ufere & Stephen Zucker, Brigham and Women's Hospital, USA  
Nneka Ufere & Gary Trey, Cambridge Health Alliance, USA  
Nneka Ufere & Kathleen Corey, Massachusetts General Hospital, USA  
Nneka Ufere & Michael Thiim, Massachusetts General Hospital, USA  
Nneka Ufere & Tracey Simon, Massachusetts General Hospital, USA  
Nneka Ufere, Massachusetts General Hospital, USA  
Nneka Ufere & Connie Huang, North Shore Medical Center, Boston, USA  
Nneka Ufere & Karim Fawaz, CHA Somerville Hospital, USA  
Nuru Bayramov, Azerbaijan Medical University, Azerbaijan  
Nurun Tania & George Abouda, Hull University Teaching Hospitals, UK  
Patricia Jones & Arosemena, University of Miami, USA  
Patricia Jones, University of Miami, USA  
Patricia Jones & Molliner, University of Miami, USA  
Patricia Jones & O'Brien, University of Miami, USA  
Patricia Jones & P Martin, University of Miami, USA  
Patricia Jones & Shane, University of Miami, USA  
Pedro Montes, Hospital Nacional Daniel Alcides Carrion, Peru  
Ponni Perumalswami & Amon Asgharpour, Mount Sinai Hospital, USA  
Ponni Perumalswami & Charissa Chang, Mount Sinai Hospital, USA  
Ponni Perumalswami & Gene Im, Mount Sinai Hospital, USA  
Ponni Perumalswami & James Crismale, Mount Sinai Hospital, USA  
Ponni Perumalswami & Jawad Ahmad, Mount Sinai Hospital, USA  
Ponni Perumalswami & Jennifer Leong, Mount Sinai Hospital, USA  
Ponni Perumalswami & Joseph Odin, Mount Sinai Hospital, USA  
Ponni Perumalswami & Kamron Pourmand, Mount Sinai Hospital, USA  
Ponni Perumalswami & Linda Law, Mount Sinai Hospital, USA  
Ponni Perumalswami & Ritu Agarwal, Mount Sinai Hospital, USA  
Ponni Perumalswami & Thomas Schiano, Mount Sinai Hospital, USA  
Ponni Perumalswami, Mount Sinai Hospital, USA  
Rainer Guenther, Department of Internal Medicine/ Liver Unit, Universitätsklinikum Schleswig-Holstein, Kiel, Germany  
Rajiv Majithia, Rex Digestive Healthcare, USA

Raymond Rubin, Piedmont Atlanta hospital, USA  
Richard Parker, Leeds Liver Unit, UK  
Roger McCorry & Neil McDougall, Royal Victoria Hospital, Belfast, UK  
Rooshi Nathwani & William Howson, Charing Cross Hospital, UK  
Rooshi Nathwani & Ameet Dhar, St Mary's Hospital, UK  
Rooshi Nathwani & Heather Lewis, St Mary's Hospital, UK  
Rooshi Nathwani & Nowlan Selvapatt, St Mary's Hospital, UK  
Rooshi Nathwani & Pinelopi Manousou, St Mary's Hospital, UK  
Rooshi Nathwani & Lucia Possamai, St Mary's Hospital, UK  
Sarah Townsen & Jane Collier, Oxford University Hospitals, UK  
Sarang Thaker & Adam Mikolajczyk, University of Illinois, Chicago, USA  
Sarang Thaker & Sean Koppe, University of Illinois, Chicago, USA  
Sathish Subramanian, Massachusetts General Hospital, USA  
Sheila Eswaran, Rush University Medical Center, USA  
Sherief Abd-Elsalam, Tanta University, Egypt  
Sonia Blanco Sampascual & Castro, Hospital Universitario Basurto, Spain  
Sonia Blanco Sampascual & F Menendez, Hospital Universitario Basurto, Spain  
Sonia Blanco Sampascual, Hospital Universitario Basurto, Spain  
Stephen Barclay & Ewan Forrest, Glasgow Royal Infirmary, UK  
Stephen Barclay, Glasgow Royal Infirmary, UK  
Steven Masson, Newcastle Hospitals, UK  
Steven Masson & Stuart McPherson, Newcastle Hospitals, UK  
Teresa Broquetas, Hospital del Mar, Barcelona, Spain  
Thines Karunakaran & Chirag Oza, Broomfield Hospital, UK  
Thomas Marjot & Maheshi Ramasamy, Horton General Hospital, UK  
Upkar Gill & Aruna Dias, Newham University Hospital (Barts Health NHS Trust), UK  
Upkar Gill & Patrick Kennedy, Newham University Hospital (Barts Health NHS Trust), UK  
Upkar Gill & Vikram Sharma, Newham University Hospital (Barts Health NHS Trust), UK  
Upkar Gill & Paul Kooner, Royal London Hospital (Barts Health NHS Trust), UK  
Upkar Gill & Graham Foster, Royal London Hospital (Barts Health NHS Trust), UK  
Upkar Gill & Patrick Kennedy, Royal London Hospital (Barts Health NHS Trust), UK

Upkar Gill & Richard Marley, Royal London Hospital (Barts Health NHS Trust), UK  
Upkar Gill & Sushma Saksena, Royal London Hospital (Barts Health NHS Trust), UK  
Upkar Gill & Vikram Sharma, Royal London Hospital (Barts Health NHS Trust), UK  
Upkar Gill & William Alazawi, Royal London Hospital (Barts Health NHS Trust), UK  
Upkar Gill & Yiannis Kallis, Royal London Hospital (Barts Health NHS Trust), UK  
Upkar Gill & Janet Dearden, Whipps Cross University Hospital (Barts Health NHS Trust), UK  
Upkar Gill & Graham Foster, Whipps Cross University Hospital (Barts Health NHS Trust), UK  
Upkar Gill & Sudeep Tanwar, Whipps Cross University Hospital (Barts Health NHS Trust), UK  
Vanessa Bernal, Hospital Universitario Miguel Servet, Zaragoza, Spain  
Veronica Nguyen & Geoffrey Block, Banner University Medical Center/University of Arizona, Tucson, USA  
Vincent Cheung & James Maggs, Stoke Mandeville Hospital, UK  
Wim Laleman, University Hospital Leuven, Belgium  
Wong Yu Jun, Changi General Hospital, Singapore  
Xavier Verhelst, Ghent University Hospital, Belgium  
Xiaolong Qi & CHESS, CHESS, China  
Xiaolong Qi & CHESS, Guangdong, China  
Xiaolong Qi & CHESS, Guangxi, China  
Xiaolong Qi & CHESS, Hubei, China  
Xiaolong Qi & CHESS, Jiangsu, China  
Xiaolong Qi & CHESS, Tianjin, China

## Supplementary annex – COVID-Hep and SECURE-Cirrhosis case report form

Inclusion Criteria:

- 1) Chronic liver disease or post-liver transplantation AND
- 2) Laboratory confirmed COVID 19 infection

Ideally this form should be completed after the patient has had COVID 19 for a long enough duration to experience complete recovery, discharge, or death.

If you have any questions, please reach out to [info@covid-hep.net](mailto:info@covid-hep.net)

### Reporter Information

Name of reporter

---

Email address of reporter

---

Name of lead physician providing care for liver disease/post-liver transplant

---

Name of center providing care for liver disease/post-liver transplant

---

Name of hospital where patient received care for COVID 19 (enter 'NA' if patient not hospitalized)

---

### Patient Information

Is the patient >90 years of age?

- Yes  
 No

Age  
Country of residence

Drop down options  
Drop down options



State of residence

- ALABAMA
- ALASKA
- AMERICAN SAMOA
- ARIZONA
- ARKANSAS
- CALIFORNIA
- COLORADO
- CONNECTICUT
- DELAWARE
- DISTRICT OF COLUMBIA
- FLORIDA
- GEORGIA
- GUAM
- HAWAII
- IDAHO
- ILLINOIS
- INDIANA
- IOWA
- KANSAS
- KENTUCKY
- LOUISIANA
- MAINE
- MARYLAND
- MASSACHUSETTS
- MICHIGAN
- MINNESOTA
- MISSISSIPPI
- MISSOURI
- MONTANA
- NEBRASKA
- NEVADA
- NEW HAMPSHIRE
- NEW JERSEY
- NEW MEXICO
- NEW YORK
- NORTH CAROLINA
- NORTH DAKOTA
- OHIO
- OKLAHOMA
- OREGON
- PENNSYLVANIA
- PUERTO RICO
- RHODE ISLAND
- SOUTH CAROLINA
- SOUTH DAKOTA
- TENNESSEE
- TEXAS
- UTAH
- VERMONT
- VIRGIN ISLANDS
- VIRGINIA
- WASHINGTON
- WEST VIRGINIA
- WISCONSIN
- WYOMING

---

Gender

- Female
- Male
- Other

---

Race/Ethnicity (may check more than one)

- White
- Black or African American
- American Indian / Native Alaskan
- East Asian (incl. Chinese, Japanese, Korean)
- South / South-East Asian (incl. Bangladeshi, Indian, Pakistani, Sri Lankan)
- Native Hawaiian / Pacific Islander
- Arabic
- Other
- Unknown

---

Other race/ethnicity

\_\_\_\_\_

---

Hispanic ethnicity

- Hispanic/Latino
- Not Hispanic/Latino
- Unknown

---

Patient BMI category (in kg/m<sup>2</sup>)

- < 18.5 (Underweight)
- 18.5-24.9 (Normal weight)
- 25.0-29.9 (Pre-obesity)
- 30.0-34.9 (Obesity class I)
- 35.0-39.9 (Obesity class II)
- >39.9 (Obesity class III)
- Unknown

## Liver transplantation questions

Has the patient had a liver transplantation?

- Yes
- No

---

What year was the liver transplantation performed?

- Unknown
- 2020
- 2019
- 2018
- 2017
- 2016
- 2015
- 2014
- 2013
- 2012
- 2011
- 2010
- 2009
- 2008
- 2007
- 2006
- 2005
- 2004
- 2003
- 2002
- 2001
- 2000
- 1999
- 1998
- 1997
- 1996
- 1995
- 1994
- 1993
- 1992
- 1991
- 1990
- 1989
- 1988
- 1987
- 1986
- 1985
- 1984
- 1983
- 1982
- 1981
- 1980
- 1979
- 1978
- 1977
- 1976
- 1975
- 1974
- 1973
- 1972
- 1971
- 1970
- 1969
- 1968
- 1967
- 1966
- 1965

---

Indication for liver transplant (select all that apply)

- Decompensated cirrhosis
- Hepatocellular carcinoma
- Acute liver failure
- Other

---

Other indication for liver transplantation

---

Underlying aetiology of liver disease (select all that apply)

- Non-alcoholic fatty liver disease (NAFLD)
  - Alcohol-related liver disease (ALD)
  - Hepatitis C virus (HCV)
  - Hepatitis B virus (HBV)
  - Autoimmune hepatitis (AIH)
  - IgG4-related disease
  - Primary biliary cholangitis (PBC)
  - Primary sclerosing cholangitis (PSC)
  - Hemochromatosis
  - Wilson's disease
  - Other
- 

Other aetiology

---

Immunosuppression regimen at time of COVID 19 infection (select all that apply)

- Prednisone
  - Tacrolimus
  - Sirolimus
  - Everolimus
  - Cyclosporine
  - Mycophenolate mofetil (MMF)
  - Azathioprine
  - Cyclophosphamide
  - Other
  - Unknown
- 

What other immunosuppression medication was used at the time of COVID 19 infection?

---

Current prophylactic antimicrobial regimen (select all that apply)

- Trimethoprim/sulfamethoxazole or Co-trimoxazole
  - Dapsone
  - Pentamidine
  - Acyclovir/valacyclovir
  - Fluconazole
  - Ganciclovir/valganciclovir
  - Foscarnet
  - Other
  - Unknown
  - None
- 

Other prophylactic antimicrobial regimen

---

---

Does the patient have any of the following comorbidities (check all that apply)?

- Cardiovascular disease (coronary artery disease, heart failure, arrhythmia, etc.)
- Diabetes
- Asthma
- COPD
- Other Chronic Lung Disease (NOT asthma/COPD)
- Hypertension
- Non-HCC cancer
- History of stroke
- Chronic renal disease (CKD, etc.)
- Human immunodeficiency virus (HIV) infection
- Current cigarette smoker
- Current user of tobacco products other than cigarettes (vaping, etc)
- Current heavy alcohol use (>2 drinks/day for men, >1 drink/day for women)
- History of illicit drug use including injectable drugs or inhaled crack/cocaine but excluding marijuana

---

### Chronic liver disease questions

Aetiology of liver disease (select all that apply)

- Non-alcoholic fatty liver disease (NAFLD)
- Alcohol-related liver disease (ALD)
- Hepatitis C virus (HCV)
- Hepatitis B virus (HBV)
- Autoimmune hepatitis (AIH)
- IgG4-related disease
- Primary biliary cholangitis (PBC)
- Primary sclerosing cholangitis (PSC)
- Hemochromatosis
- Wilson's disease
- Other

---

Other aetiology

\_\_\_\_\_

---

Does the patient have cirrhosis?

- Yes
- No
- Unknown

---

Child Pugh grade prior to COVID 19 diagnosis?

- A
- B
- C
- Unknown

---

Did the patient have ascites prior to COVID 19 diagnosis?

- None
- Mild/moderate (diuretic responsive)
- Severe (diuretic refractory)
- Unknown

---

What was the worst grade of hepatic encephalopathy patient developed prior to COVID 19 diagnosis?

- None
- Grade 1 (trivial lack of awareness, shortened attention span)
- Grade 2 (lethargy, minimal disorientation, subtle personality change)
- Grade 3 (somnolence to semi-stupor but responsive to verbal stimuli, gross disorientation)
- Grade 4 (coma - unresponsive to verbal or noxious stimuli)
- Unknown

---

Has the patient ever had hepatocellular carcinoma?

- Yes
- No
- Unknown

---

What immunosuppression was the patient taking for IgG4-related disease at time of COVID 19 diagnosis (may check more than one)?

- None
- Corticosteroids
- Azathioprine
- Rituximab
- Other
- Unknown

---

Other immunosuppression for IgG4-related disease

---

---

Has the patient received steroids for alcoholic hepatitis recently (within 4 weeks of COVID 19 diagnosis)?

- Yes
- No
- Unknown

---

Treatment for primary biliary cholangitis (PBC) at time of COVID 19 diagnosis

- Ursodeoxycholic acid
- Obeticholic acid
- Fibrate
- Other
- No treatment
- Unknown

---

Other PBC treatments

---

---

Does the patient have inflammatory bowel disease (IBD)?

- Yes
- No
- Unknown

---

Immunosuppression medication(s) patient was taking for IBD at time of COVID 19 diagnosis

- Prednisone/prednisolone
- Budesonide
- Azathioprine
- Methotrexate
- Mycophenolate
- Infliximab
- Adalimumab
- Ustekinumab
- Vedolizumab
- Other
- None
- Unknown

---

Other immunosuppression for IBD

---

---

Treatment for autoimmune hepatitis (AIH) at time of COVID 19 diagnosis

- Prednisone/prednisolone
- Budesonide
- Azathioprine
- Mycophenolate
- Tacrolimus
- Other
- None
- Unknown

---

Other treatment for AIH

---

---

Hepatitis B surface antigen (HBsAg) positive

- Yes
- No
- Unknown

---

Treatment for HBV at the time of COVID 19 diagnosis

- Tenofovir
- Entecavir
- Interferon
- None
- Unknown

---

Did the patient have detectable hepatitis C virus (HCV) RNA at the time of or prior to COVID 19 diagnosis?

- Yes
- No
- Unknown

---

HCV genotype

- 1
- 2
- 3
- 4
- 5
- 6
- 7
- Unknown

---

Active treatment for HCV at the time of COVID 19 diagnosis

- Yes
- No
- Unknown

---

Does the patient have any of the following comorbidities (check all that apply)?

- Cardiovascular disease (coronary artery disease, heart failure, arrhythmia, etc.)
- Diabetes
- Asthma
- COPD
- Other Chronic Lung Disease (NOT asthma/COPD)
- Hypertension
- Non-HCC cancer
- History of stroke
- Chronic renal disease (CKD, etc.)
- Human immunodeficiency virus (HIV) infection
- Current cigarette smoker
- Current user of tobacco products other than cigarettes (vaping, etc)
- Current heavy alcohol use (>2 drinks/day for men, >1 drink/day for women)
- History of illicit drug use including injectable drugs or inhaled crack/cocaine but excluding marijuana

**Laboratory data (leave fields blank if unknown)**

- If COVID-19 suspected at presentation/admission then use recent pre-admission laboratory values as baseline.
- If hospital acquired COVID-19 suspected then please use first laboratory values obtained during hospitalisation as baseline.

Baseline serum sodium (mmol/L)

\_\_\_\_\_ (Before COVID 19 infection)

Nadir serum sodium (mmol/L)

\_\_\_\_\_ (During COVID 19 infection)

Creatinine units

$\mu\text{mol/L}$     mg/dl

Baseline serum creatinine

\_\_\_\_\_ (Before COVID 19 infection)

Peak serum creatinine

\_\_\_\_\_ (During COVID 19 infection)

Baseline prothrombin time (sec)

\_\_\_\_\_ (Before COVID 19 infection)

Peak prothrombin time (sec)

\_\_\_\_\_ (During COVID 19 infection)

Albumin units

g/dl    g/liter

Baseline albumin

\_\_\_\_\_ (Before COVID 19 infection)

Nadir albumin

\_\_\_\_\_ (During COVID 19 infection)

Total bilirubin units

$\mu\text{mol/L}$     mg/dl

Baseline total bilirubin

\_\_\_\_\_ (Before COVID 19 infection)

Peak total bilirubin

\_\_\_\_\_ (During COVID 19 infection)

Baseline alanine aminotransferase (ALT) (IU/L)

\_\_\_\_\_ (Before COVID 19 infection)



---

Peak alanine aminotransferase (ALT) (IU/L)

---

(During COVID 19 infection)

---

Baseline alkaline phosphatase (IU/L)

---

(Before COVID 19 infection)

---

Peak alkaline phosphatase (IU/L)

---

(During COVID 19 infection)

---

### COVID 19 questions

---

Was this lab confirmed COVID 19 infection?

- Yes  
 No  
 Unknown

---

What symptoms did the patient have at the time of COVID 19 diagnosis?

- GI symptoms (abdominal pain, diarrhea, nausea, vomiting)  
 Respiratory symptoms (shortness of breath, cough)  
 Both GI and respiratory symptoms  
 Neither GI or respiratory symptoms  
 Unknown

---

Did patient test positive for influenza at time of COVID 19 infection?

- Yes  
 No  
 Unknown

---

What complications did the patient develop during COVID 19 infection?

- New or worsening ascites  
 Spontaneous bacterial peritonitis  
 Hepatic encephalopathy  
 Non-variceal upper GI bleeding  
 Variceal upper GI bleeding  
 New requirement for renal replacement therapy (e.g. hemodialysis)  
 Other

---

Other complications of COVID 19 infection

---

---

What was the grade of ascites during COVID 19 infection?

- Mild/moderate  
 Severe  
 Unknown

---

What was the worst grade of hepatic encephalopathy during COVID 19 infection (based on West Haven Criteria)?

- Grade 1 (trivial lack of awareness, shortened attention span)  
 Grade 2 (lethargy, minimal disorientation, subtle personality change)  
 Grade 3 (somnolence to semi-stupor but responsive to verbal stimuli, gross disorientation)  
 Grade 4 (coma - unresponsive to verbal or noxious stimuli)  
 Unknown

---

Did the patient receive specific antiviral treatment for COVID 19 infection?

- Yes  
 No  
 Unknown

---

Which of the following treatment(s) did patient receive for COVID 19 (select all that apply)?

- Remdesivir
- Tocilizumab
- Lopinovir/ritonavir
- Chloroquine/hydroxychloroquine
- Ribavirin
- Interferon-alpha
- Other
- Unknown

---

Other type of antiviral treatment(s) received for COVID-19

\_\_\_\_\_

---

What was the reason the patient did not receive COVID 19 antiviral treatment (select all that apply)?

- Elevated liver enzymes
- Underlying liver fibrosis/cirrhosis
- Other contraindication (eg AKI)
- Treatment not available
- Other
- Unknown

---

What was the reason the patient did not receive COVID 19 antiviral treatment?

\_\_\_\_\_

---

Did the patient die?

- Yes
- No
- Unknown

---

What was the primary cause of death?

- Liver-related complications
- COVID 19-related lung disease
- Cardiogenic shock
- Other

---

Other cause of death

\_\_\_\_\_

---

Has the patient been hospitalized?

- Yes
- No
- Unknown

---

Has the patient been discharged from the hospital?

- Yes
- No
- Unknown

---

Length of hospital stay (days)

\_\_\_\_\_

---

Did patient receive invasive ventilation?

- Yes
- No
- Unknown

---

Did the patient receive non-invasive ventilation?

- Yes
- No
- Unknown

---

Was the patient admitted to an intensive care unit?

- Yes
- No
- Unknown

---

Why was the patient not admitted to an intensive care unit?

- Disease not severe enough
- Disease was severe enough but limited availability of intensive care unit
- Disease was severe enough but escalation to intensive care unit not felt to be appropriate.
- Unknown
